# Supplementary material for: Higher dietary intakes of choline and betaine are associated with a lower risk of primary liver cancer: a case-control study
Source: PubMed Central journal article supplement (PMC5429604; doi:10.1038/s41598-017-00773-w), 2017-04-06
Supplement: 41598_2017_773_MOESM1_ESM.pdf [file 41598_2017_773_MOESM1_ESM.pdf]

**Higher dietary intakes of choline and betaine are associated with a lower risk of primary liver cancer: a case-control study**

**Rui-fen Zhou<sup>1#</sup>, Xiao-Lin Chen<sup>1#</sup>, Zhong-guo Zhou<sup>2</sup>, Yao-jun Zhang<sup>2</sup>, Qiu-ye Lan<sup>1</sup>, Gong-cheng Liao<sup>1</sup>, Yu-ming Chen<sup>1</sup>, Hui-lian Zhu<sup>1\*</sup>**

<sup>1</sup> School of Public Health, Sun Yat-sen University, Guangzhou (510080), People's Republic of China;

<sup>2</sup> Department of Hepatobiliary Surgery, Sun Yat-sen University Cancer Center, Guangzhou (510080), People's Republic of China

# These authors contributed equally to this work.

\* The corresponding author:

**Hui-lian Zhu, PhD, MD**

*Professor*

*Department of Nutrition*

*School of Public Health*

*Sun Yat-sen University*

*Guangzhou 510080*

*People's Republic of China*

*Email: zhuhl@mail.sysu.edu.cn*

*Tel.: +86 20 87331811*

*Fax: +86 20 87330446*

## Author List

### **Rui-fen Zhou:**

Affiliations: Department of Nutrition , School of Public Health, Sun Yat-sen University, Guangzhou, P. R. China

E-mail address: [1123487506@qq.com](mailto:1123487506@qq.com)

Work telephone number: +86 18824178816

### **Xiao-Lin Chen**

Affiliations: Department of Nutrition , School of Public Health, Sun Yat-sen University, Guangzhou, P. R. China

E-mail address: [448037995@qq.com](mailto:448037995@qq.com)

Work telephone number: +86 3533184974

### **Zhong-guo Zhou:**

Affiliations: Department of Hepatobiliary Surgery, Sun Yat-sen University Cancer Center, Guangzhou, P. R. China

E-mail address: [zhouzhg@sysucc.org.cn](mailto:zhouzhg@sysucc.org.cn)

### **Yao-jun Zhang:**

Affiliations: Department of Hepatobiliary Surgery, Sun Yat-sen University Cancer Center, Guangzhou, P. R. China

E-mail address: [zhangyuj@sysucc.org.cn](mailto:zhangyuj@sysucc.org.cn)

### **Qiu-ye Lan:**

Affiliations: Department of Nutrition , School of Public Health, Sun Yat-sen University, Guangzhou, P. R. China

E-mail address: [bolivia.lan@gmail.com](mailto:bolivia.lan@gmail.com)

### **Gong-cheng Liao:**

Affiliations: Department of Nutrition , School of Public Health, Sun Yat-sen University, Guangzhou, P. R. China

E-mail address: [1368653532@qq.com](mailto:1368653532@qq.com)

### **Yu-ming Chen:**

Affiliations: Department of Medical Statistics & Epidemiology, School of Public Health, Sun Yat-sen University, Guangzhou, P. R. China

E-mail address: [chenyum@mail.sysu.edu.cn](mailto:chenyum@mail.sysu.edu.cn)

### **Hui-lian Zhu:**

Affiliations: Department of Nutrition, School of Public Health, Sun Yat-sen University, Guangzhou, P. R. China

E-mail address: [zhuhl@mail.sysu.edu.cn](mailto:zhuhl@mail.sysu.edu.cn)

Work telephone number : 0086 20 87331811

Work fax number: 0086 20 87330446

**Supplemental Table S1. Top five contributors of food sources of total choline, main choline containing compounds and betaine among all subjects**

| <b>Nutrients intake</b>             | <b>Food source</b>                                                        | <b>Proportion (%)</b> |      |
|-------------------------------------|---------------------------------------------------------------------------|-----------------------|------|
| Total choline<br>(273.5 mg/d)       | Eggs                                                                      | 21.5                  |      |
|                                     | Streaky Pork                                                              | 13.0                  |      |
|                                     | Lean Hogs                                                                 | 10.8                  |      |
|                                     | Chinese flowering cabbage, mustard greens,<br>collard greens and broccoli | 8.7                   |      |
|                                     | Poultry                                                                   | 4.0                   |      |
| Phosphatidylcholine<br>(167.9 mg/d) | Eggs                                                                      | 32.7                  |      |
|                                     | Streaky Pork                                                              | 16.1                  |      |
|                                     | Lean Hogs                                                                 | 11.0                  |      |
|                                     | Chinese flowering cabbage, mustard greens,<br>collard greens and broccoli | 7.3                   |      |
|                                     | Freshwater fishes                                                         | 4.4                   |      |
| Sphingomyelin<br>(13.5 mg/d)        | Streaky Pork                                                              | 20.9                  |      |
|                                     | Lean Hogs                                                                 | 18.7                  |      |
|                                     | Eggs                                                                      | 18.1                  |      |
|                                     | Poultry                                                                   | 14.2                  |      |
|                                     | Regular front feet                                                        | 6.2                   |      |
| Free choline<br>(46.0 mg/d)         | Chinese flowering cabbage, mustard greens,<br>collard greens and broccoli | 10.8                  |      |
|                                     | Chinese cabbage, cauliflower, celery                                      | 8.1                   |      |
|                                     | Chinese cabbage, leaf lettuce, and lettuce                                | 7.6                   |      |
|                                     | Rice                                                                      | 6.9                   |      |
|                                     | Soymilk                                                                   | 5.1                   |      |
|                                     | Glycerophosphocholine<br>(26.7 mg/d)                                      | Lean Hogs             | 24.8 |
|                                     |                                                                           | Rice                  | 15.3 |
| Streaky Pork                        |                                                                           | 10.6                  |      |
| Whole milk                          |                                                                           | 9.9                   |      |
| Porridge                            |                                                                           | 5.7                   |      |
| Phosphocholine<br>(13.1 mg/d)       | Chinese flowering cabbage, mustard greens,<br>collard greens and broccoli | 40.5                  |      |
|                                     | Chinese cabbage, leaf lettuce, and lettuce                                | 6.5                   |      |
|                                     | Whole milk                                                                | 4.9                   |      |
|                                     | Wax gourd, cucumber and zucchini                                          | 4.8                   |      |
|                                     | Soymilk                                                                   | 4.7                   |      |
| Betaine<br>(85.4 mg/d)              | Noodles                                                                   | 26.1                  |      |
|                                     | Spinach                                                                   | 23.4                  |      |
|                                     | Steamed buns                                                              | 14.9                  |      |
|                                     | Whole-wheat bread                                                         | 9.5                   |      |
|                                     | Freshwater fishes                                                         | 6.0                   |      |

|             |                   |      |
|-------------|-------------------|------|
| Methionine  | Rice              | 34.4 |
| (1904 mg/d) | Porridge          | 12.9 |
|             | Lean hogs         | 10.9 |
|             | Freshwater fishes | 5.5  |
|             | Eggs              | 4.4  |

---

**Supplemental Table S2. Associations between tertiles of total choline, betaine, methionine intake and primary liver cancer risk according to lifestyle behaviors<sup>1</sup>**

|                                 | n (cases/controls) | OR (95% CI)       | n (cases/controls) | OR (95% CI)       |
|---------------------------------|--------------------|-------------------|--------------------|-------------------|
| <b>Smoking</b>                  |                    | <b>No</b>         |                    | <b>Yes</b>        |
| <b>Tertile of total choline</b> |                    |                   |                    |                   |
| T1                              | 161/120            | 1.00              | 155/94             | 1.00              |
| T2                              | 78/121             | 0.48 (0.32, 0.73) | 104/95             | 0.64 (0.42, 0.97) |
| T3                              | 60/120             | 0.38 (0.25, 0.59) | 86/94              | 0.47 (0.30, 0.72) |
| <i>P</i> -trend                 |                    | <0.001            |                    | 0.001             |
| <i>P</i> -interaction           |                    |                   | 0.406              |                   |
| <b>Tertile of betaine</b>       |                    |                   |                    |                   |
| T1                              | 133/120            | 1.00              | 171/94             | 1.00              |
| T2                              | 90/121             | 0.84 (0.56, 1.27) | 79/95              | 0.48 (0.31, 0.73) |
| T3                              | 76/120             | 0.76 (0.50, 1.16) | 95/94              | 0.54 (0.35, 0.83) |
| <i>P</i> -trend                 |                    | 0.199             |                    | 0.003             |
| <i>P</i> -interaction           |                    |                   | 0.259              |                   |
| <b>Tertile of methionine</b>    |                    |                   |                    |                   |
| T1                              | 81/120             | 1.00              | 99/94              | 1.00              |
| T2                              | 68/121             | 0.77 (0.49, 1.20) | 96/95              | 1.01 (0.65, 1.55) |
| T3                              | 150/120            | 1.65 (1.10, 2.47) | 150/94             | 1.25 (0.83, 1.90) |
| <i>P</i> -trend                 |                    | 0.008             |                    | 0.276             |
| <i>P</i> -interaction           |                    |                   | 0.218              |                   |
| <b>Score *</b>                  |                    |                   |                    |                   |
| 0                               | 62/27              | 1.00              | 70/32              | 1.00              |
| 1                               | 116/112            | 0.39 (0.22, 0.71) | 145/81             | 0.72 (0.42, 1.24) |
| 2                               | 86/136             | 0.26 (0.14, 0.47) | 105/124            | 0.34 (0.20, 0.59) |
| 3                               | 35/86              | 0.19 (0.10, 0.38) | 25/46              | 0.23 (0.11, 0.48) |
| <i>P</i> -trend                 |                    | <0.001            |                    | <0.001            |
| <i>P</i> -interaction           |                    |                   | 0.790              |                   |
| <b>Alcohol use</b>              |                    | <b>No</b>         |                    | <b>Yes</b>        |
| <b>Tertile of total choline</b> |                    |                   |                    |                   |
| T1                              | 210/173            | 1.00              | 127/41             | 1.00              |
| T2                              | 132/173            | 0.63 (0.45, 0.87) | 42/42              | 0.34 (0.18, 0.62) |
| T3                              | 94/173             | 0.45 (0.32, 0.65) | 39/42              | 0.31 (0.17, 0.57) |
| <i>P</i> -trend                 |                    | <0.001            |                    | <0.001            |
| <i>P</i> -interaction           |                    |                   | 0.070              |                   |
| <b>Tertile of betaine</b>       |                    |                   |                    |                   |
| T1                              | 207/173            | 1.00              | 94/41              | 1.00              |
| T2                              | 114/173            | 0.62 (0.44, 0.86) | 70/42              | 0.82 (0.46, 1.47) |
| T3                              | 115/173            | 0.61 (0.44, 0.87) | 44/42              | 0.55 (0.30, 1.03) |
| <i>P</i> -trend                 |                    | 0.004             |                    | 0.064             |
| <i>P</i> -interaction           |                    |                   | 0.918              |                   |

**Tertile of methionine**

|                       |         |                   |       |                   |
|-----------------------|---------|-------------------|-------|-------------------|
| T1                    | 117/173 | 1.00              | 68/41 | 1.00              |
| T2                    | 108/173 | 0.93 (0.65, 1.32) | 61/42 | 0.91 (0.49, 1.68) |
| T3                    | 211/173 | 1.73 (1.24, 2.42) | 79/42 | 1.04 (0.58, 1.86) |
| <i>P</i> -trend       |         | 0.001             |       | 0.894             |
| <i>P</i> -interaction |         |                   | 0.179 |                   |

**Score**

|                       |         |                   |       |                   |
|-----------------------|---------|-------------------|-------|-------------------|
| 0                     | 93/45   | 1.00              | 39/14 | 1.00              |
| 1                     | 176/167 | 0.44 (0.28, 0.69) | 85/26 | 1.12 (0.50, 2.49) |
| 2                     | 127/210 | 0.26 (0.16, 0.41) | 64/50 | 0.48 (0.22, 1.04) |
| 3                     | 40/97   | 0.20 (0.11, 0.36) | 20/35 | 0.26 (0.10, 0.63) |
| <i>P</i> -trend       |         | <0.001            |       | <0.001            |
| <i>P</i> -interaction |         |                   | 0.669 |                   |

**Drink tea****No****Yes****Tertile of total choline**

|                       |        |                   |         |                   |
|-----------------------|--------|-------------------|---------|-------------------|
| T1                    | 139/82 | 1.00              | 176/132 | 1.00              |
| T2                    | 80/82  | 0.56 (0.36, 0.89) | 115/133 | 0.62 (0.43, 0.90) |
| T3                    | 72/82  | 0.42 (0.26, 0.67) | 62/133  | 0.35 (0.23, 0.54) |
| <i>P</i> -trend       |        | <0.001            |         | <0.001            |
| <i>P</i> -interaction |        |                   | 0.360   |                   |

**Tertile of betaine**

|                       |        |                   |         |                   |
|-----------------------|--------|-------------------|---------|-------------------|
| T1                    | 115/82 | 1.00              | 167/132 | 1.00              |
| T2                    | 97/82  | 0.88 (0.56, 1.37) | 97/133  | 0.80 (0.54, 1.17) |
| T3                    | 79/82  | 0.64 (0.41, 1.02) | 89/133  | 0.66 (0.44, 0.98) |
| <i>P</i> -trend       |        | 0.062             |         | 0.038             |
| <i>P</i> -interaction |        |                   | 0.399   |                   |

**Tertile of methionine**

|                       |        |                   |         |                   |
|-----------------------|--------|-------------------|---------|-------------------|
| T1                    | 76/82  | 1.00              | 106/132 | 1.00              |
| T2                    | 71/82  | 0.96 (0.60, 1.55) | 90/133  | 0.75 (0.50, 1.13) |
| T3                    | 144/82 | 1.96 (1.25, 3.06) | 157/133 | 1.16 (0.79, 1.71) |
| <i>P</i> -trend       |        | 0.002             |         | 0.385             |
| <i>P</i> -interaction |        |                   | 0.401   |                   |

**Score**

|                       |        |                   |         |                   |
|-----------------------|--------|-------------------|---------|-------------------|
| 0                     | 63/28  | 1.00              | 69/31   | 1.00              |
| 1                     | 127/91 | 0.52 (0.29, 0.92) | 134/102 | 0.57 (0.33, 0.99) |
| 2                     | 79/92  | 0.31 (0.17, 0.57) | 112/168 | 0.30 (0.17, 0.51) |
| 3                     | 22/35  | 0.18 (0.08, 0.40) | 38/97   | 0.23 (0.12, 0.43) |
| <i>P</i> -trend       |        | <0.001            |         | <0.001            |
| <i>P</i> -interaction |        |                   | 0.686   |                   |

**BMI(kg/m<sup>2</sup>)****<25****≥25****Tertile of total choline**

|    |         |                   |       |                   |
|----|---------|-------------------|-------|-------------------|
| T1 |         | 1.00              |       | 1.00              |
| T2 | 252/157 | 0.58 (0.41, 0.80) | 69/57 | 0.51 (0.28, 0.91) |

|                                 |         |                   |         |                   |
|---------------------------------|---------|-------------------|---------|-------------------|
| T3                              | 141/157 | 0.39 (0.27, 0.56) | 43/58   | 0.37 (0.20, 0.70) |
| <i>P</i> -trend                 | 107/157 | <0.001            | 32/58   | 0.002             |
| <i>P</i> -interaction           |         |                   |         | 0.929             |
| <b>Tertile of betaine</b>       |         |                   |         |                   |
| T1                              | 247/157 | 1.00              | 54/57   | 1.00              |
| T2                              | 131/157 | 0.61 (0.44, 0.85) | 46/58   | 0.94 (0.52, 1.71) |
| T3                              | 122/157 | 0.51 (0.36, 0.73) | 44/58   | 1.03 (0.57, 1.88) |
| <i>P</i> -trend                 |         | <0.001            |         | 0.920             |
| <i>P</i> -interaction           |         |                   |         | 0.044             |
| <b>Tertile of methionine</b>    |         |                   |         |                   |
| T1                              | 150/157 | 1.00              | 40/57   | 1.00              |
| T2                              | 119/157 | 0.82 (0.58, 1.17) | 27/58   | 0.77 (0.40, 1.48) |
| T3                              | 231/157 | 1.47 (1.06, 2.03) | 77/58   | 1.80 (1.00, 3.23) |
| <i>P</i> -trend                 |         | 0.016             |         | 0.034             |
| <i>P</i> -interaction           |         |                   |         | 0.547             |
| <b>Score</b>                    |         |                   |         |                   |
| 0                               | 106/41  | 1.00              | 26/18   | 1.00              |
| 1                               | 205/140 | 0.52 (0.33, 0.81) | 56/53   | 0.73 (0.33, 1.63) |
| 2                               | 145/195 | 0.27 (0.17, 0.43) | 46/65   | 0.49 (0.22, 1.08) |
| 3                               | 44/95   | 0.19 (0.11, 0.33) | 16/37   | 0.35 (0.14, 0.88) |
| <i>P</i> -trend                 |         | <0.001            |         | 0.009             |
| <i>P</i> -interaction           |         |                   |         | 0.228             |
| <b>Age (years)</b>              |         |                   |         |                   |
|                                 |         | <b>≤54</b>        |         | <b>&gt;54</b>     |
| <b>Tertile of total choline</b> |         |                   |         |                   |
| T1                              | 161/108 | 1.00              | 166/106 | 1.00              |
| T2                              | 98/109  | 0.55 (0.37, 0.82) | 79/107  | 0.53 (0.34, 0.82) |
| T3                              | 66/108  | 0.31 (0.20, 0.49) | 74/106  | 0.51 (0.33, 0.80) |
| <i>P</i> -trend                 |         | <0.001            |         | 0.002             |
| <i>P</i> -interaction           |         |                   |         | 0.486             |
| <b>Tertile of betaine</b>       |         |                   |         |                   |
| T1                              | 119/108 | 1.00              | 181/106 | 1.00              |
| T2                              | 101/109 | 0.82 (0.55, 1.24) | 64/107  | 0.46 (0.29, 0.71) |
| T3                              | 105/108 | 0.88 (0.58, 1.32) | 74/106  | 0.49 (0.32, 0.76) |
| <i>P</i> -trend                 |         | 0.541             |         | 0.001             |
| <i>P</i> -interaction           |         |                   |         | 0.019             |
| <b>Tertile of methionine</b>    |         |                   |         |                   |
| T1                              | 124/108 | 1.00              | 65/106  | 1.00              |
| T2                              | 76/109  | 0.61 (0.40, 0.92) | 69/107  | 0.95 (0.58, 1.55) |
| T3                              | 125/108 | 0.93 (0.63, 1.37) | 185/106 | 2.74 (1.75, 4.28) |
| <i>P</i> -trend                 |         | 0.707             |         | <0.001            |
| <i>P</i> -interaction           |         |                   |         | <0.001            |
| <b>Score</b>                    |         |                   |         |                   |
| 0                               | 68/40   | 1.00              | 64/19   | 1.00              |

|                                 |         |                   |         |                   |
|---------------------------------|---------|-------------------|---------|-------------------|
| 1                               | 136/109 | 0.71 (0.43, 1.17) | 125/84  | 0.39 (0.20, 0.75) |
| 2                               | 95/131  | 0.39 (0.23, 0.65) | 96/129  | 0.22 (0.11, 0.42) |
| 3                               | 26/45   | 0.29 (0.15, 0.57) | 34/87   | 0.15 (0.07, 0.31) |
| <i>P</i> -trend                 |         | <0.001            |         | <0.001            |
| <i>P</i> -interaction           |         |                   | 0.155   |                   |
| <b>Physical activity</b>        |         | <b>≤33.3</b>      |         | <b>&gt;33.3</b>   |
| <b>(MET· h per day)</b>         |         |                   |         |                   |
| <b>Tertile of total choline</b> |         |                   |         |                   |
| T1                              | 210/71  | 1.00              | 125/143 | 1.00              |
| T2                              | 127/72  | 0.45 (0.27, 0.75) | 57/143  | 0.50 (0.32, 0.77) |
| T3                              | 92/72   | 0.42 (0.24, 0.73) | 33/143  | 0.27 (0.16, 0.44) |
| <i>P</i> -trend                 |         | 0.001             |         | <0.001            |
| <i>P</i> -interaction           |         |                   | 0.047   |                   |
| <b>Tertile of betaine</b>       |         |                   |         |                   |
| T1                              | 192/71  | 1.00              | 112/143 | 1.00              |
| T2                              | 122/72  | 0.94 (0.56, 1.56) | 55/143  | 0.61 (0.40, 0.95) |
| T3                              | 115/72  | 0.88 (0.52, 1.51) | 48/143  | 0.51 (0.32, 0.80) |
| <i>P</i> -trend                 |         | 0.643             |         | 0.003             |
| <i>P</i> -interaction           |         |                   | 0.225   |                   |
| <b>Tertile of methionine</b>    |         |                   |         |                   |
| T1                              | 109/71  | 1.00              | 69/143  | 1.00              |
| T2                              | 102/72  | 0.93 (0.54, 1.62) | 53/143  | 0.79 (0.50, 1.25) |
| T3                              | 218/72  | 1.52 (0.90, 2.54) | 93/143  | 1.28 (0.84, 1.97) |
| <i>P</i> -trend                 |         | 0.091             |         | 0.225             |
| <i>P</i> -interaction           |         |                   | 0.245   |                   |
| <b>Score</b>                    |         |                   |         |                   |
| 0                               | 81/11   | 1.00              | 51/48   | 1.00              |
| 1                               | 167/67  | 0.31 (0.14, 0.70) | 94/126  | 0.76 (0.45, 1.27) |
| 2                               | 138/91  | 0.22 (0.10, 0.51) | 53/169  | 0.36 (0.21, 0.62) |
| 3                               | 43/46   | 0.16 (0.07, 0.41) | 17/86   | 0.25 (0.12, 0.51) |
| <i>P</i> -trend                 |         | <0.001            |         | <0.001            |
| <i>P</i> -interaction           |         |                   | 0.831   |                   |
| <b>Education level</b>          |         | <b>Low</b>        |         | <b>High</b>       |
| <b>Tertile of total choline</b> |         |                   |         |                   |
| T1                              | 178/87  | 1.00              | 138/127 | 1.00              |
| T2                              | 105/87  | 0.54 (0.35, 0.83) | 87/128  | 0.53 (0.35, 0.81) |
| T3                              | 66/87   | 0.31 (0.20, 0.49) | 70/128  | 0.42 (0.27, 0.66) |
| <i>P</i> -trend                 |         | <0.001            |         | <0.001            |
| <i>P</i> -interaction           |         |                   | 0.327   |                   |
| <b>Tertile of betaine</b>       |         |                   |         |                   |
| T1                              | 161/87  | 1.00              | 130/127 | 1.00              |
| T2                              | 96/87   | 0.65 (0.43, 1.01) | 81/128  | 0.75 (0.49, 1.13) |
| T3                              | 92/87   | 0.56 (0.36, 0.86) | 84/128  | 0.78 (0.51, 1.18) |



|                                 |         |                          |         |                    |
|---------------------------------|---------|--------------------------|---------|--------------------|
| <i>P</i> -trend                 |         | 0.008                    |         | 0.216              |
| <i>P</i> -interaction           |         |                          | 0.359   |                    |
| <b>Tertile of methionine</b>    |         |                          |         |                    |
| T1                              | 116/87  | 1.00                     | 74/127  | 1.00               |
| T2                              | 80/87   | 0.64 (0.41, 0.99)        | 73/128  | 0.98 (0.62, 1.53)  |
| T3                              | 153/87  | 1.16 (0.77, 1.76)        | 148/128 | 1.79 (1.17, 2.72)  |
| <i>P</i> -trend                 |         | 0.429                    |         | 0.004              |
| <i>P</i> -interaction           |         |                          | 0.139   |                    |
| <b>Score</b>                    |         |                          |         |                    |
| 0                               | 84/32   | 1.00                     | 48/27   | 1.00               |
| 1                               | 157/101 | 0.55 (0.33, 0.93)        | 104/92  | 0.64 (0.34, 1.20)  |
| 2                               | 89/100  | 0.31 (0.18, 0.53)        | 102/160 | 0.38 (0.20, 0.69)  |
| 3                               | 19/28   | 0.21 (0.09, 0.46)        | 41/104  | 0.25 (0.13, 0.50)  |
| <i>P</i> -trend                 |         | <0.001                   |         | <0.001             |
| <i>P</i> -interaction           |         |                          | 0.702   |                    |
| <b>HBV infectious</b>           |         |                          |         |                    |
|                                 |         | <b>No</b>                |         | <b>Yes</b>         |
| <b>Tertile of total choline</b> |         |                          |         |                    |
| T1                              | 61/214  | 1.00                     | 266/214 | 1.00               |
| T2                              | 29/215  | 0.47 (0.27, 0.80)        | 148/215 | 0.53 (0.39, 0.72)  |
| T3                              | 31/215  | 0.37 (0.21, 0.64)        | 109/215 | 0.37 (0.27, 0.52)  |
| <i>P</i> -trend                 |         | <0.001                   |         | <0.001             |
| <b>Tertile of betaine</b>       |         |                          |         |                    |
| T1                              | 63/214  | 1.00                     | 239/214 | 1.00               |
| T2                              | 32/215  | 0.55 (0.33, 0.92)        | 141/215 | 0.68 (0.50, 0.92)  |
| T3                              | 26/215  | 0.42 (0.24, 0.73)        | 143/215 | 0.66 (0.48, 0.89)  |
| <i>P</i> -trend                 |         | 0.002                    |         | 0.006              |
| <b>Tertile of methionine</b>    |         |                          |         |                    |
| T1                              | 35/214  | 1.00                     | 148/214 | 1.00               |
| T2                              | 26/215  | 0.72 (0.40, 1.30)        | 136/215 | 0.91 (0.66, 1.25)  |
| T3                              | 60/215  | 1.43 (0.86, 2.38)        | 239/215 | 1.55 (1.14, 2.09)  |
| <i>P</i> -trend                 |         | 0.128                    |         | 0.003              |
| <b>Score</b>                    |         |                          |         |                    |
| 0                               | 29/59   | 1.00                     | 103/59  | 1.00               |
| 1                               | 48/193  | 0.48 (0.26, 0.90)        | 213/193 | 0.59 (0.39, 0.89)  |
| 2                               | 33/260  | 0.23 (0.12, 0.45)        | 158/260 | 0.33 (0.22, 0.49)  |
| 3                               | 11/132  | 0.17 (0.07, 0.40)        | 49/132  | 0.22 (0.13, 0.36)  |
| <i>P</i> -trend                 |         | <0.001                   |         | <0.001             |
| <b>Diagnosis</b>                |         |                          |         |                    |
|                                 |         | <b>Tissue evaluation</b> |         | <b>MRI imaging</b> |
| <b>Tertile of total choline</b> |         |                          |         |                    |
| T1                              | 124/214 | 1.00                     | 203/214 | 1.00               |
| T2                              | 57/215  | 0.43 (0.28, 0.64)        | 120/215 | 0.60 (0.43, 0.83)  |
| T3                              | 46/215  | 0.33 (0.21, 0.51)        | 94/215  | 0.41 (0.29, 0.58)  |
| <i>P</i> -trend                 |         | <0.001                   |         | <0.001             |

|                              |         |                   |         |                   |
|------------------------------|---------|-------------------|---------|-------------------|
| <b>Tertile of betaine</b>    |         |                   |         |                   |
| T1                           | 112/214 | 1.00              | 190/214 | 1.00              |
| T2                           | 69/215  | 0.71 (0.48, 1.04) | 104/215 | 0.63 (0.45, 0.88) |
| T3                           | 46/215  | 0.46 (0.30, 0.70) | 123/215 | 0.71 (0.51, 0.99) |
| <i>P</i> -trend              |         | <0.001            |         | 0.032             |
| <b>Tertile of methionine</b> |         |                   |         |                   |
| T1                           | 62/214  | 1.00              | 121/214 | 1.00              |
| T2                           | 72/215  | 1.15 (0.76, 1.74) | 90/215  | 0.72 (0.50, 1.02) |
| T3                           | 93/215  | 1.36 (0.91, 2.04) | 206/215 | 1.54 (1.12, 2.13) |
| <i>P</i> -trend              |         | 0.135             |         | 0.004             |
| <b>Score</b>                 |         |                   |         |                   |
| 0                            | 47/59   | 1.00              | 85/59   | 1.00              |
| 1                            | 96/193  | 0.54 (0.33, 0.91) | 165/193 | 0.55 (0.36, 0.85) |
| 2                            | 65/260  | 0.28 (0.16, 0.47) | 126/260 | 0.32 (0.21, 0.49) |
| 3                            | 19/132  | 0.17 (0.09, 0.34) | 41/132  | 0.22 (0.13, 0.38) |
| <i>P</i> -trend              |         | <0.001            |         | <0.001            |

ORs (95% CI): from multivariate unconditional logistic regression models.

<sup>1</sup>adjusted for sex, age, daily energy intake (ln-transformed), BMI, education level, occupation, household income, smoking, alcohol consumption, drink tea, physical activity.

*P*-trend:  $\alpha$  for *p*-trends = 0.05/6(tests) = 0.0083

Abbreviation: CI=confidence interval

\*: summing the scores of each nutrient of choline (0= < median, 1= ≥ median), betaine (0= < median, 1= ≥ median), and methionine (0 = quartile 1 and 4, 1= quartile 2 and 3)

**Supplemental Table S 3 . Odds ratios (OR) and 95% confidence intervals (CI) of primary liver cancer according to tertiles of total choline, betaine, methionine intake in men**

|                              | Amount<br>(mg/d) | n (cases/controls) | Model1<br>OR (95% CI) | Model2<br>OR (95% CI) |
|------------------------------|------------------|--------------------|-----------------------|-----------------------|
| <b>Tertile of choline</b>    |                  |                    |                       |                       |
| T1                           | <253             | 269/186            | 1.00                  | 1.00                  |
| T2                           | 253-315          | 161/186            | 0.61 (0.46, 0.81)     | 0.59 (0.44, 0.80)     |
| T3                           | >315             | 129/187            | 0.48 (0.36, 0.64)     | 0.44 (0.32, 0.62)     |
| <i>P</i> -trend              |                  |                    | <0.001                | <0.001                |
| <b>Tertile of betaine</b>    |                  |                    |                       |                       |
| T1                           | <72              | 259/186            | 1.00                  | 1.00                  |
| T2                           | 72-117           | 149/186            | 0.57 (0.42, 0.75)     | 0.64 (0.47, 0.87)     |
| T3                           | >117             | 151/187            | 0.57 (0.43, 0.76)     | 0.64 (0.47, 0.88)     |
| <i>P</i> -trend              |                  |                    | <0.001                | 0.005                 |
| <b>Tertile of methionine</b> |                  |                    |                       |                       |
| T1                           | <1757            | 169/186            | 1.00                  | 1.00                  |
| T2                           | 1757-2004        | 136/186            | 0.81 (0.60, 1.10)     | 0.92 (0.66, 1.28)     |

|                 |       |         |                   |                   |
|-----------------|-------|---------|-------------------|-------------------|
| T3              | >2004 | 254/187 | 1.51 (1.14, 2.00) | 1.71 (1.22, 2.39) |
| <i>P</i> -trend |       |         | 0.002             | 0.001             |

**Tertile of folate ( $\mu\text{g/d}$ )**

|                 |         |         |                   |                   |
|-----------------|---------|---------|-------------------|-------------------|
| T1              | <309    | 199/186 | 1.00              | 1.00              |
| T2              | 309-360 | 160/186 | 0.81 (0.60, 1.09) | 1.31 (0.91, 1.89) |
| T3              | >360    | 200/187 | 1.02 (0.76, 1.35) | 2.66 (1.57, 4.51) |
| <i>P</i> -trend |         |         | 0.915             | <0.001            |

---

Models 1 and 2: from conditional logistic model.

Model 1: adjusted for daily energy intake (ln-transformed), besides matched by sex and age.

Model 2: Model 1 +, BMI, education level, occupation, household income, smoking, drinking, drink tea, physical activity and dietary folate intake.
